# Supplementary material
Source: PubMed Central journal article supplement (PMC8357279)
Supplement: aem.00567-21-s0001.pdf [file aem.00567-21-s0001.pdf]

**Fig S1.** Inhibition (%) of APEC growth by peptides at **A)** 6 mM and **B)** 12 mM concentrations. Peptides were added to the wells of the 96-well plate containing APEC suspension ( $5 \times 10^5$  CFU/mL) and incubated at 37°C in TECAN Sunrise<sup>TM</sup> absorbance microplate reader with kinetic absorbance measurement set at every 30 mins for 12 h. The inhibition (%) was calculated using the formula:  $(OD_{600} \text{ DMSO treated well} - OD_{600} \text{ peptide treated well}) / OD_{600} \text{ DMSO treated well} \times 100\%$ .

**Fig. S2.** Shannon's diversity index measuring the microbial richness in cecum of chickens treated with peptides at **A)** 50 mg/kg and **B)** 100 mg/kg dose, NC: non-infected and non-treated chickens, PC: infected but not treated chickens.  $*P < 0.05$ , Kruskal-Wallis test.

**Fig. S3:** Principal Coordinates Analysis (PCoA) plot comparing the microbial communities (weighted unifracs beta-diversity) in cecum of chickens treated with peptides at **A)** 50 mg/kg and **B)** 100 mg/kg dose, NC: non-infected and non-treated chickens, PC: infected but not treated chickens.

**Fig. S4. A)** Schematic diagram showing the experimental design to test the efficacy of peptides in commercial broiler chickens. Peptides were administered through orally twice a day from day 1 to day 7 either at 50 mg/kg or 100 mg/kg dose. On day 2, chickens were infected orally with Rif<sup>r</sup> APEC O78 ( $1-2 \times 10^9$  CFU/chicken). At day 9, chickens were euthanized, necropsied and cecum and internal organs (lung, liver, heart and kidney) were processed for quantification of APEC load. The body weight of chickens was measured at day 9.

**Figure S1**

**A**

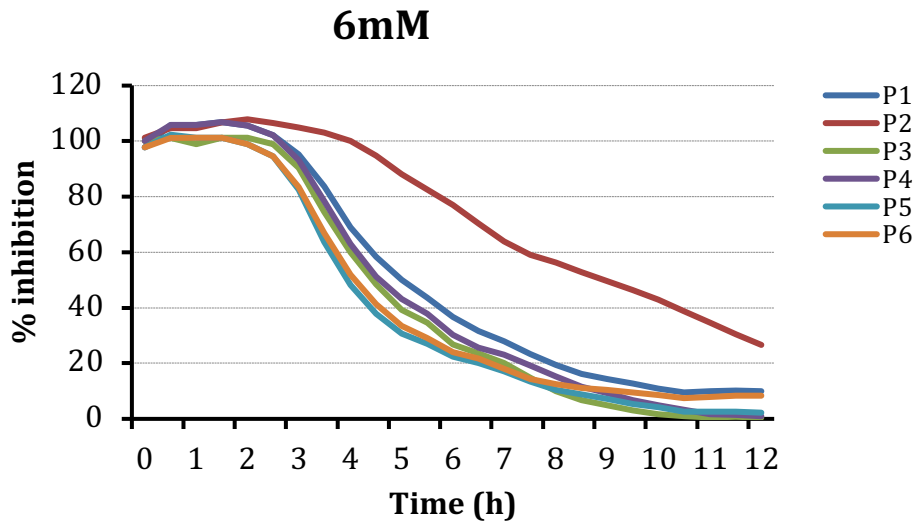

**B**

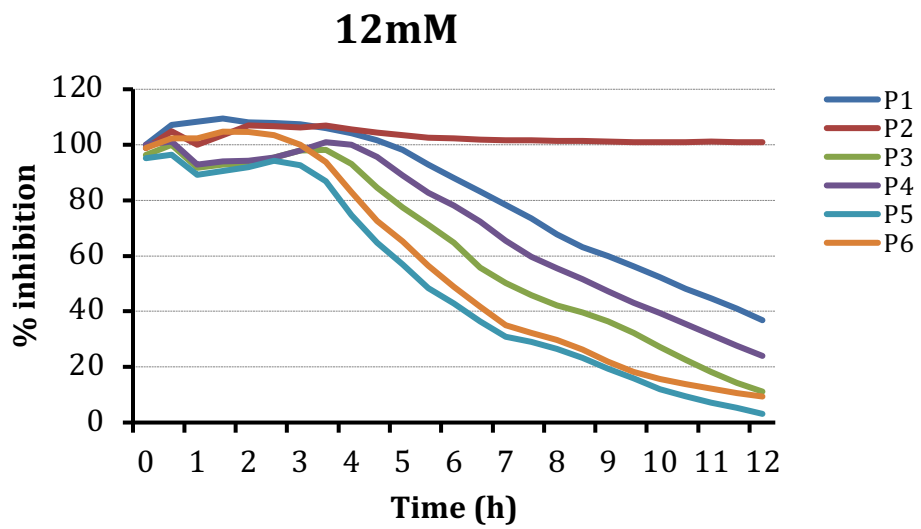

Figure S2

A

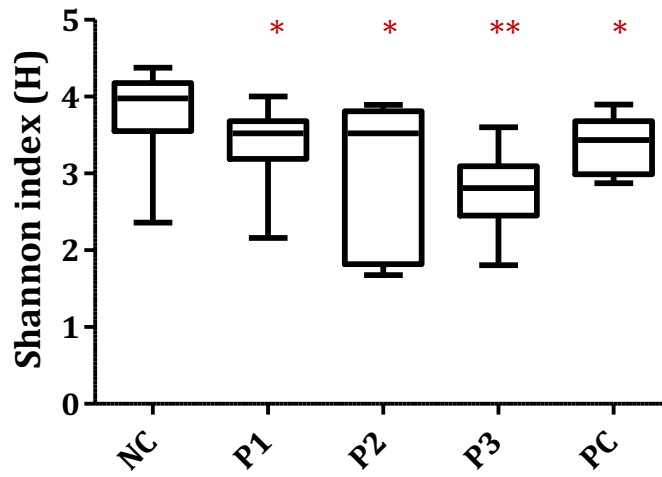

B

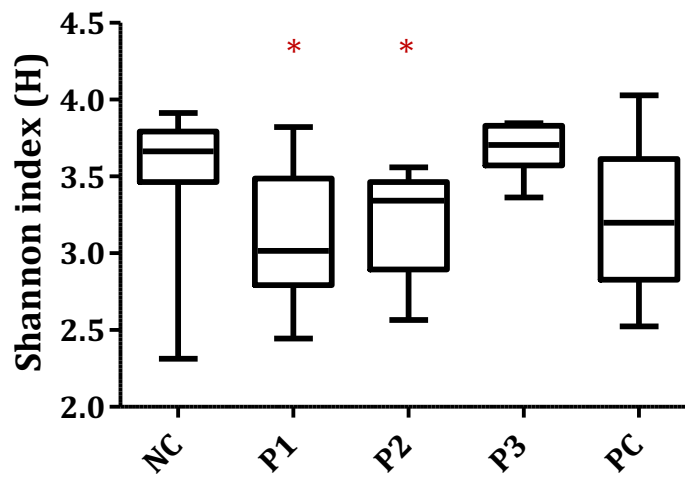

**Figure S3**

**A**

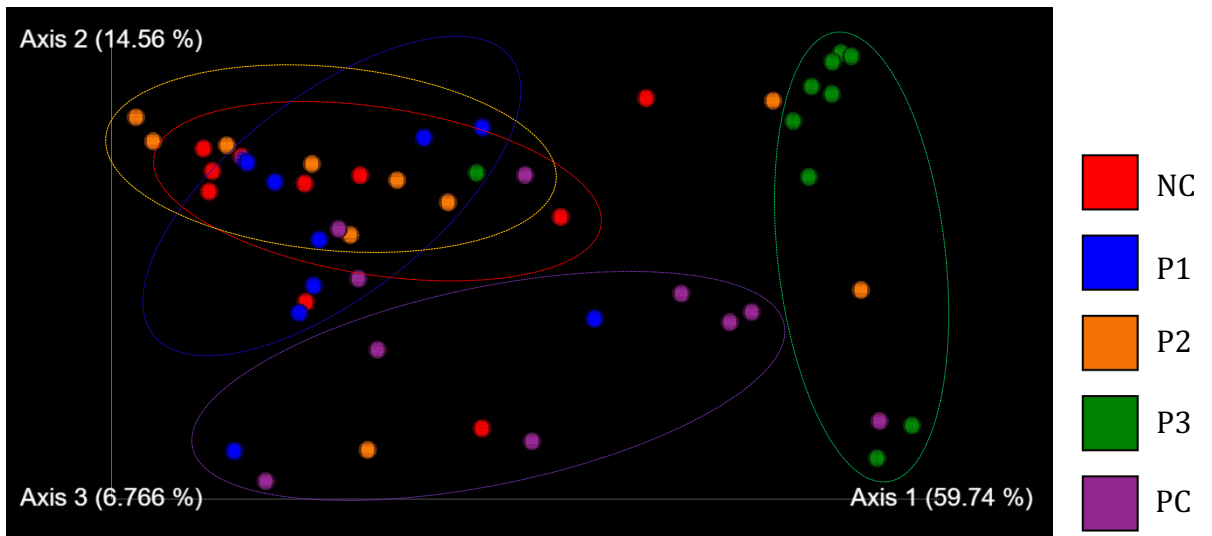

**B**

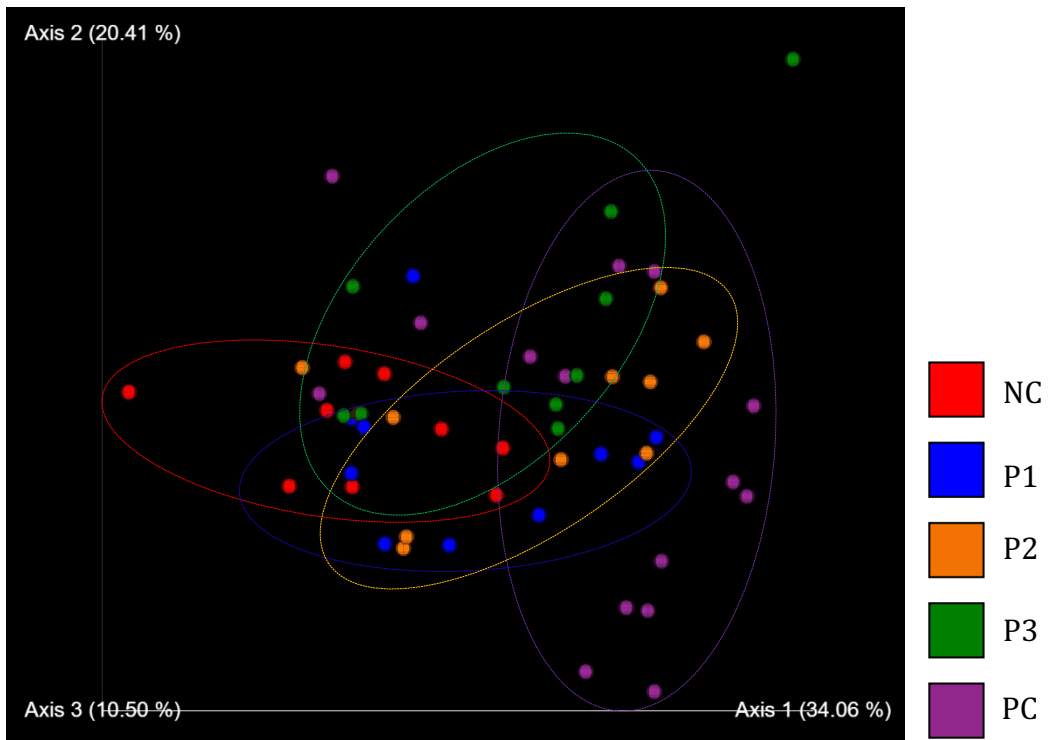

**Figure S4**

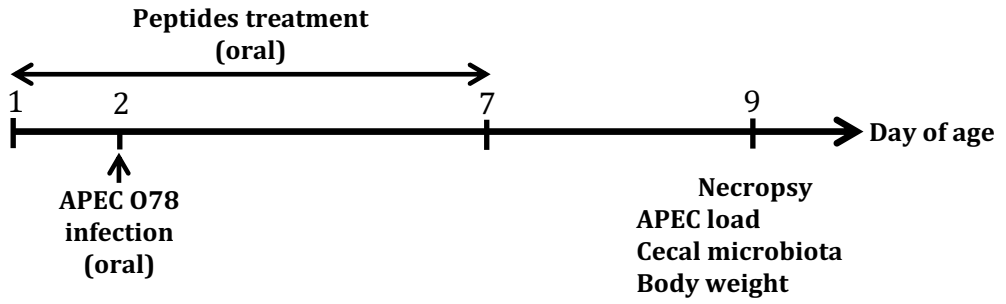

**Table S1.** MIC<sub>50</sub> concentrations of peptides against APEC O78.

| <b>Peptide</b> | <b>MIC<sub>50</sub> (mM)</b> |
|----------------|------------------------------|
| P1             | 14.7                         |
| P2             | 9.5                          |
| P3             | 16.2                         |
| P4             | 20.0                         |

**Table S2.** Sequence of alanine analogues of peptides.

| <b>Peptide</b> | <b>Sequence</b>        |
|----------------|------------------------|
| P1-1           | A <sup>o</sup> PSRQERR |
| P1-2           | N <sup>o</sup> ASRQERR |
| P1-3           | NP <sup>o</sup> ARQERR |
| P1-4           | NPS <sup>o</sup> AQERR |
| P1-5           | NPSR <sup>o</sup> AERR |
| P1-6           | NPSRQ <sup>o</sup> ARR |
| P1-7           | NPSRQE <sup>o</sup> AR |
| P1-8           | NPSRQER <sup>o</sup> A |
| P2-1           | A <sup>o</sup> DENK    |
| P2-2           | P <sup>o</sup> AENK    |
| P2-3           | PD <sup>o</sup> ANK    |
| P2-4           | PDE <sup>o</sup> AK    |
| P2-5           | PDEN <sup>o</sup> A    |
| P3-1           | A <sup>o</sup> HTAPK   |
| P3-2           | V <sup>o</sup> ATAPK   |
| P3-3           | VH <sup>o</sup> AAPK   |
| P3-4           | VHTA <sup>o</sup> AK   |
| P3-5           | VHTAPA <sup>o</sup>    |
